# Supplementary material for: Polymerization of 1,3-butadiene catalyzed by cobalt(II) and nickel(II) complexes bearing pyridine-2-imidate ligands
Source: Springer Nature journal article supplement (doi:10.1007/s10118-016-1825-1), 2016-07-27
Supplement: 10118_2016_1825_MOESM1_ESM.pdf [file 10118_2016_1825_MOESM1_ESM.pdf]

## Electronic Supplementary Material

### Polymerization of 1,3-Butadiene Catalyzed by Cobalt(II) and Nickel(II) Complexes Bearing Pyridine-2-imidate Ligands

Heng Liu<sup>a</sup>, Shi-ze Yang<sup>b</sup>, Feng Wang<sup>a</sup>, Chen-xi Bai<sup>a</sup>, Yan-ming Hu<sup>a\*</sup> and Xue-quan Zhang<sup>a\*</sup>

<sup>a</sup> Key Laboratory of Synthetic Rubber, Changchun Institute of Applied Chemistry, Chinese Academy of Sciences, Changchun 130022, China

<sup>b</sup> Panjin Northern Asphalt Co., Ltd, Norinco Group, Panjin 124000, China

Supporting information to doi: 10.1007/s10118-016-1825-1.

**Table S1.** Crystallographic data and structure refinement for ligand **a** and complex **1a**

|                                                      | <b>a</b>                                                      | <b>1a</b>                                                                       |
|------------------------------------------------------|---------------------------------------------------------------|---------------------------------------------------------------------------------|
| Formula                                              | C <sub>20</sub> H <sub>26</sub> N <sub>2</sub> O <sub>2</sub> | C <sub>20</sub> H <sub>26</sub> Br <sub>2</sub> CoN <sub>2</sub> O <sub>2</sub> |
| Fw                                                   | 326.43                                                        | 545.18                                                                          |
| Color                                                | yellow                                                        | green                                                                           |
| Cryst. Syst.                                         | triclinic                                                     | monoclinic                                                                      |
| Space group                                          | P-1                                                           | P21/n                                                                           |
| <i>a</i> , (Å)                                       | 10.7891 (8)                                                   | 10.9357 (7)                                                                     |
| <i>b</i> , (Å)                                       | 13.0232 (9)                                                   | 16.0601 (10)                                                                    |
| <i>c</i> , (Å)                                       | 15.2810 (11)                                                  | 12.5508 (8)                                                                     |
| $\alpha$ , (deg)                                     | 107.233 (1)                                                   | 90                                                                              |
| $\beta$ , (deg)                                      | 108.803 (1)                                                   | 94.681 (1)                                                                      |
| $\gamma$ , (deg)                                     | 93.494 (2)                                                    | 90                                                                              |
| <i>V</i> , Å <sup>3</sup>                            | 1912.0 (2)                                                    | 2196.9 (2)                                                                      |
| <i>Z</i>                                             | 4                                                             | 4                                                                               |
| <i>T</i> , K                                         | 188                                                           | 188                                                                             |
| <i>D</i> <sub>calcd</sub> , (g cm <sup>-3</sup> )    | 1.134                                                         | 1.648                                                                           |
| $\mu$ (Mo K $\alpha$ ), (mm <sup>-1</sup> )          | 0.07                                                          | 4.43                                                                            |
| <i>F</i> (000)                                       | 704                                                           | 1092                                                                            |
| $\theta$ <sub>range</sub> , (deg)                    | 1.5–25.1                                                      | 2.1–26.0                                                                        |
| no. of rflns collected                               | 9609                                                          | 11556                                                                           |
| no. of indep rflns                                   | 6655                                                          | 4319                                                                            |
| data/ restraints /params                             | 6655/0/433                                                    | 4319/0/ 244                                                                     |
| Goodness of fit                                      | 0.836                                                         | 0.851                                                                           |
| R <sub>1</sub> ( <i>I</i> > 2 $\sigma$ ( <i>I</i> )) | 0.060                                                         | 0.028                                                                           |
| wR <sub>2</sub>                                      | 0.254                                                         | 0.075                                                                           |

\* Corresponding authors: Yan-ming Hu (胡雁鸣), E-mail: ymhu@ciac.ac.cn  
 Xue-quan Zhang (张学全), E-mail: xqzhang@ciac.ac.cn
